# Supplementary material for: Disclosing ambiguous gene aliases by automatic literature profiling
Source: PubMed Central journal article supplement (PMC3045796; doi:10.1186/1471-2164-11-s5-s3), 2010-12-22
Supplement: 1471-2164-11-S5-S3-S3.pdf [file 1471-2164-11-S5-S3-S3.pdf]

Jaccard distance

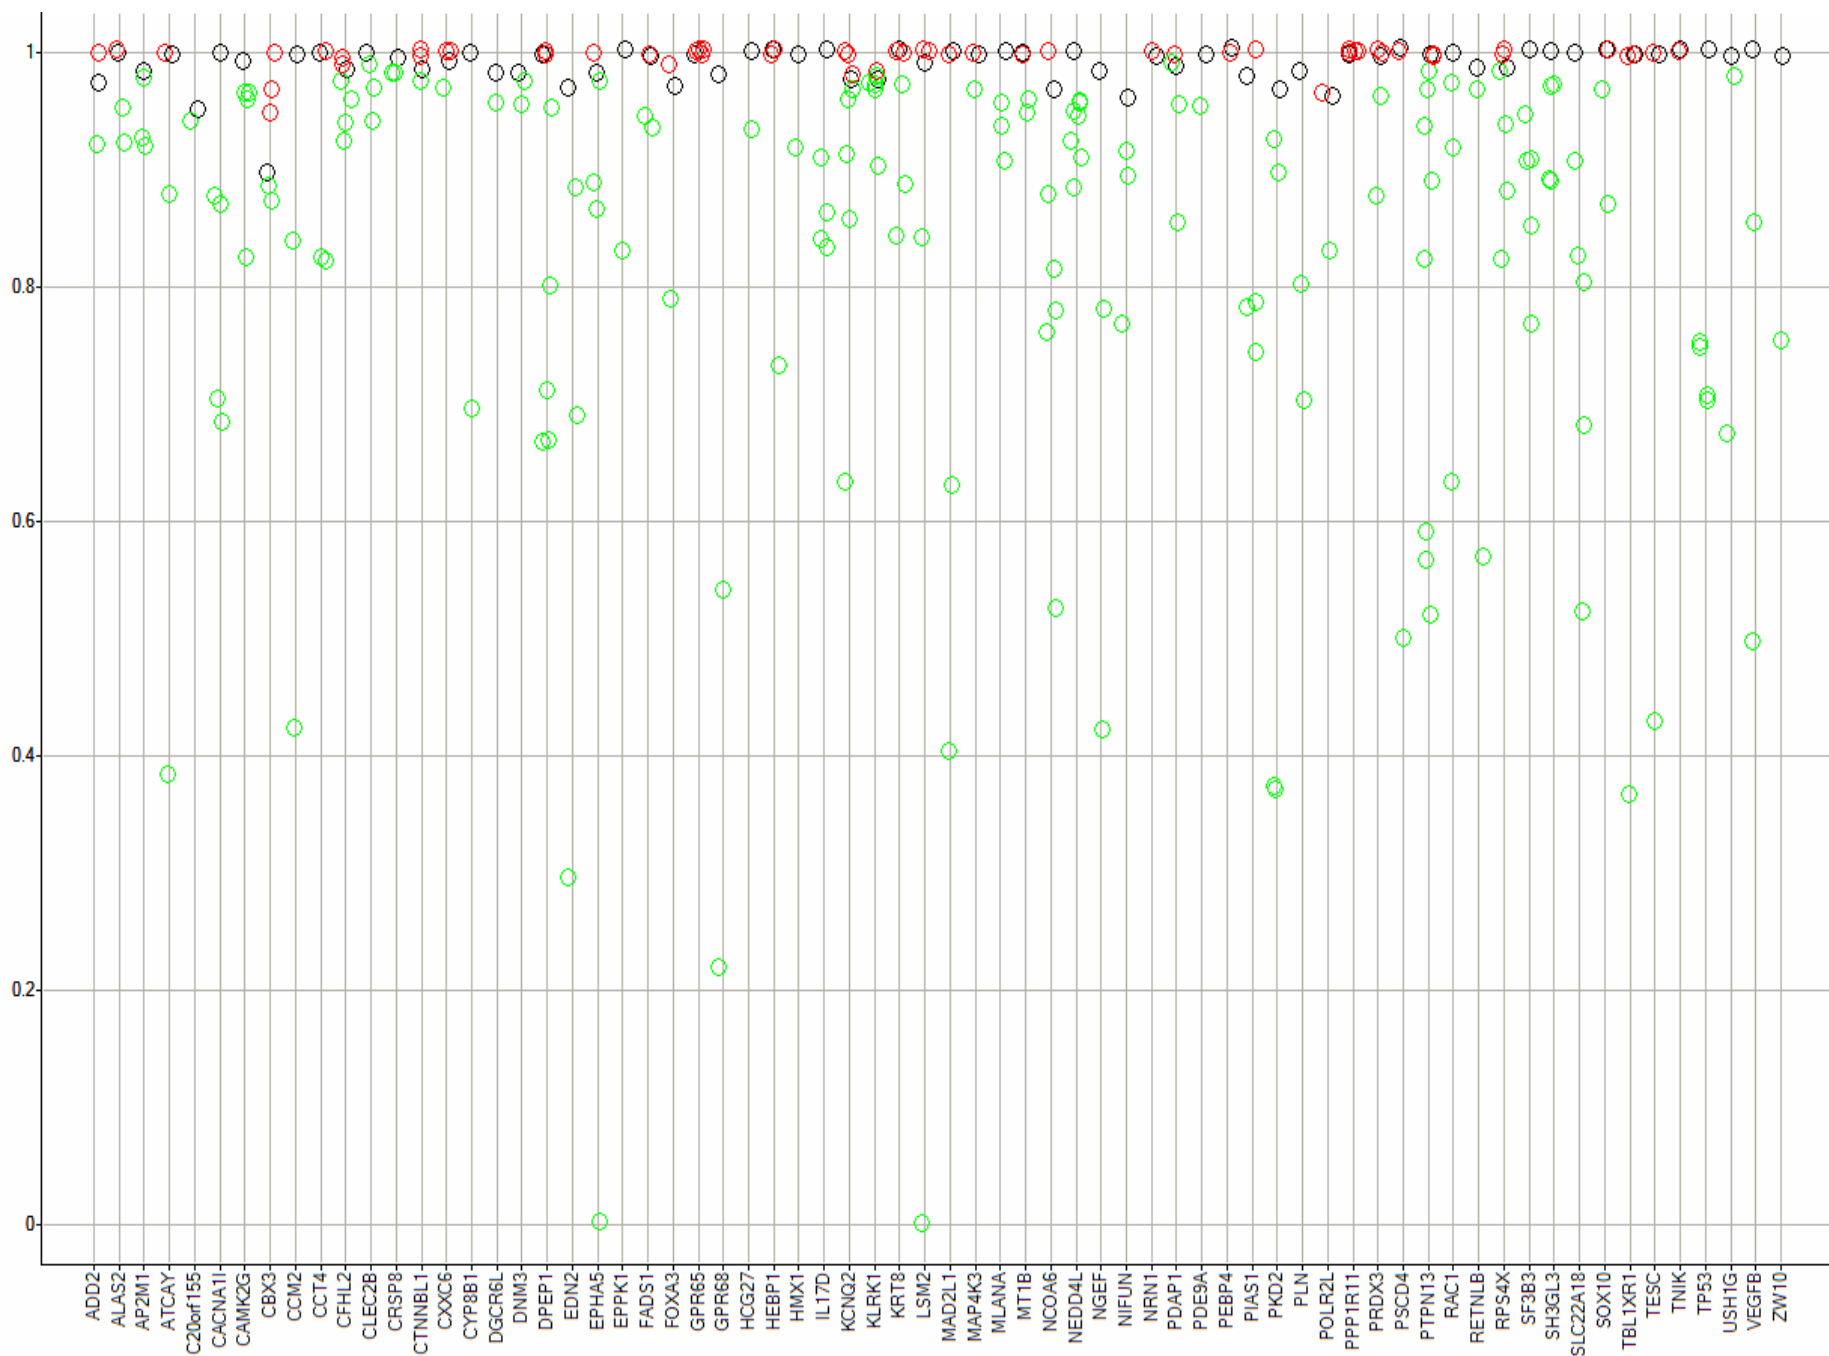

EntrezGene official symbols
